# Supplementary material for: Mechanisms by which Porphyromonas gingivalis evades innate immunity
Source: PubMed Central journal article supplement (PMC5542538; doi:10.1371/journal.pone.0182164), 2017-08-03

Figure S1

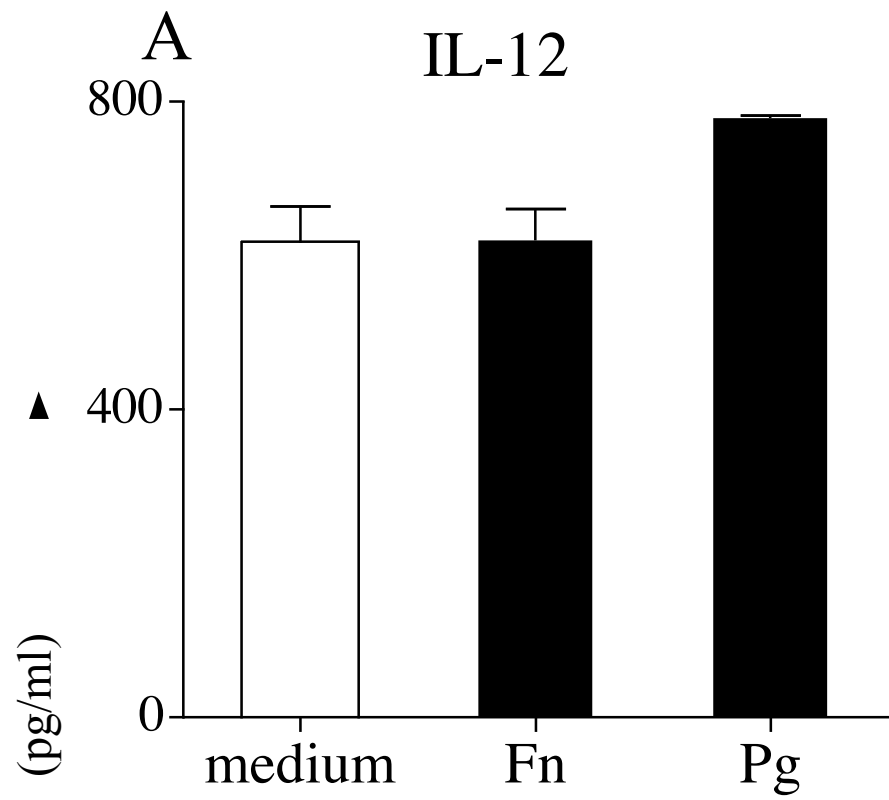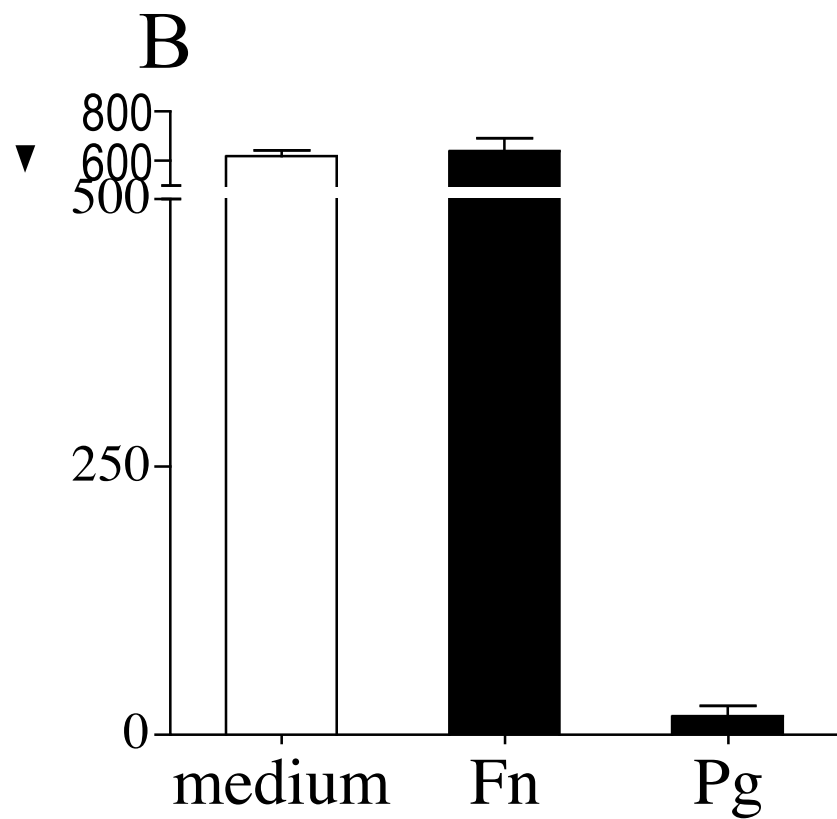

Supplement: pone.0182164.s001.pdf [file pone.0182164.s001.pdf]
