# Supplementary material for: Mechanisms by which Porphyromonas gingivalis evades innate immunity
Source: PubMed Central journal article supplement (PMC5542538; doi:10.1371/journal.pone.0182164), 2017-08-03
Supplement: pone.0182164.s002.pdf [file pone.0182164.s002.pdf]

Figure S2

| BAND #1   |                                                                                                                                               |     |        |   |        |          |          |           |                 |       |          |             |
|-----------|-----------------------------------------------------------------------------------------------------------------------------------------------|-----|--------|---|--------|----------|----------|-----------|-----------------|-------|----------|-------------|
| Reference | Peptide                                                                                                                                       | MH+ | DeltaM | z | Score  | Coverage | MW       | Accession | Peptide (Hits)  | Count | % Height | Peak Height |
| Scan(s)   |                                                                                                                                               |     |        |   | XC     | DeltaCn  | Sp       | RSp       | Ions            |       |          |             |
| 1         | receptor antigen (RagA) [Porphyromonas gingivalis]                                                                                            |     |        |   | 460.33 | 42.40    | 112261.3 | 3901098   | 57 (57 0 0 0 0) |       |          | 49.03       |
| 2         | AF153768_1 immunoreactive 92 kDa antigen PG21 [Porphyromonas gingivalis]                                                                      |     |        |   | 250.31 | 28.00    | 91460.8  | 5059346   | 30 (30 0 0 0 0) |       |          | 31.51       |
| 3         | 1 KGP83_PORGI RecName: Full=Lys-gingipain W83; AltName: Full=Lysine specific cysteine protease; AltName: Full=Lysine-specific cysteine protei |     |        |   | 150.29 | 12.10    | 187756.8 | 75348574  | 16 (16 0 0 0 0) |       |          | 1.42        |
| 4         | PAD_PORGI RecName: Full=Peptidylarginine deiminase; Flags: Precursor                                                                          |     |        |   | 150.29 | 30.00    | 61690.5  | 73621345  | 17 (17 0 0 0 0) |       |          | 6.45        |
| 5         | AF175718_1 immunoreactive 32kD antigen PG49 [Porphyromonas gingivalis]                                                                        |     |        |   | 80.28  | 32.70    | 37089.1  | 5759285   | 8 (8 0 0 0 0)   |       |          | 0.70        |
| 6         | AF237554_1 hypothetical tonB-linked outer membrane receptor PG50 [Porphyromonas gingivalis]                                                   |     |        |   | 80.27  | 15.70    | 94396.0  | 8925305   | 8 (8 0 0 0 0)   |       |          | 0.77        |
| 7         | PRTT_PORGI RecName: Full=Thiol protease/hemagglutinin prtI; Flags: Precursor                                                                  |     |        |   | 70.28  | 11.40    | 96386.1  | 1172653   | 7 (7 0 0 0 0)   |       |          | 0.84        |
| 8         | AF200358_1 HmuY protein [Porphyromonas gingivalis]                                                                                            |     |        |   | 40.29  | 52.10    | 15552.7  | 6409428   | 4 (4 0 0 0 0)   |       |          | 0.29        |
| 9         | AF153770_1 immunoreactive 47 kDa antigen PG97 [Porphyromonas gingivalis]                                                                      |     |        |   | 40.18  | 11.00    | 47120.1  | 5059350   | 4 (4 0 0 0 0)   |       |          | 0.07        |
| 10        | A Chain A, Crystal Structure Of The Arg Specific Cysteine Proteinase Gingipain R (Rgpb)                                                       |     |        |   | 30.31  | 10.80    | 47853.8  | 7245522   | 4 (4 0 0 0 0)   |       |          | 0.88        |
| 11        | CPG2_PORGI RecName: Full=Gingipain R2; AltName: Full=Arg-gingipain; AltName: Full=Gingipain 2; AltName: Full=RGP-2; Flags: Precursor          |     |        |   | 30.29  | 4.90     | 80916.2  | 37538303  | 4 (4 0 0 0 0)   |       |          | 0.24        |
| 12        | RagA2 [Porphyromonas gingivalis]                                                                                                              |     |        |   | 30.26  | 3.20     | 115464.3 | 61652426  | 4 (4 0 0 0 0)   |       |          | 3.94        |
| 13        | JC7920 35K hemin binding protein - Porphyromonas gingivalis                                                                                   |     |        |   | 30.19  | 13.70    | 37536.4  | 60729604  | 3 (3 0 0 0 0)   |       |          | 0.20        |
| 14        | RagA4 [Porphyromonas gingivalis]                                                                                                              |     |        |   | 20.24  | 2.20     | 114515.1 | 61652416  | 2 (2 0 0 0 0)   |       |          | 3.66        |

  

| BAND #2   |                                                                                                                                             |     |        |   |        |          |          |           |                 |       |          |             |
|-----------|---------------------------------------------------------------------------------------------------------------------------------------------|-----|--------|---|--------|----------|----------|-----------|-----------------|-------|----------|-------------|
| Reference | Peptide                                                                                                                                     | MH+ | DeltaM | z | Score  | Coverage | MW       | Accession | Peptide (Hits)  | Count | % Height | Peak Height |
| Scan(s)   |                                                                                                                                             |     |        |   | XC     | DeltaCn  | Sp       | RSp       | Ions            |       |          |             |
| 1         | KGP83_PORGI RecName: Full=Lys-gingipain W83; AltName: Full=Lysine specific cysteine protease; AltName: Full=Lysine-specific cysteine protei |     |        |   | 410.34 | 20.70    | 187756.8 | 75348574  | 66 (66 0 0 0 0) |       |          | 57.07       |
| 2         | unnamed protein product [Porphyromonas gingivalis]                                                                                          |     |        |   | 270.40 | 63.70    | 56434.6  | 116636501 | 35 (35 0 0 0 0) |       |          | 13.90       |
| 3         | A Chain A, Crystal Structure Of The Arg Specific Cysteine Proteinase Gingipain R (Rgpb)                                                     |     |        |   | 170.32 | 37.90    | 47853.8  | 7245522   | 20 (20 0 0 0 0) |       |          | 7.77        |
| 4         | JC7920 35K hemin binding protein - Porphyromonas gingivalis                                                                                 |     |        |   | 130.28 | 34.30    | 37536.4  | 60729604  | 15 (15 0 0 0 0) |       |          | 3.90        |
| 5         | PAD_PORGI RecName: Full=Peptidylarginine deiminase; Flags: Precursor                                                                        |     |        |   | 120.27 | 26.30    | 61690.5  | 73621345  | 15 (15 0 0 0 0) |       |          | 7.04        |
| 6         | AF153770_1 immunoreactive 47 kDa antigen PG97 [Porphyromonas gingivalis]                                                                    |     |        |   | 110.20 | 29.70    | 47120.1  | 5059350   | 12 (12 0 0 0 0) |       |          | 0.71        |
| 7         | receptor antigen (RagA) [Porphyromonas gingivalis]                                                                                          |     |        |   | 90.29  | 12.50    | 112261.3 | 3901098   | 9 (9 0 0 0 0)   |       |          | 0.37        |
| 8         | KGP66_PORGI RecName: Full=Lys-gingipain HG66; Contains: RecName: Full=Lys-gingipain catalytic subunit; Contains: RecName: Full=39 kDa       |     |        |   | 50.27  | 3.80     | 186713.3 | 75345025  | 6 (6 0 0 0 0)   |       |          | 3.03        |
| 9         | AF200358_1 HmuY protein [Porphyromonas gingivalis]                                                                                          |     |        |   | 50.26  | 52.80    | 15552.7  | 6409428   | 6 (6 0 0 0 0)   |       |          | 0.46        |
| 10        | CPG2_PORGI RecName: Full=Gingipain R2; AltName: Full=Arg-gingipain; AltName: Full=Gingipain 2; AltName: Full=RGP-2; Flags: Precursor        |     |        |   | 40.30  | 6.40     | 80916.2  | 37538303  | 6 (6 0 0 0 0)   |       |          | 3.10        |
| 11        | AF153768_1 immunoreactive 92 kDa antigen PG21 [Porphyromonas gingivalis]                                                                    |     |        |   | 40.23  | 5.70     | 91460.8  | 5059346   | 4 (4 0 0 0 0)   |       |          | 0.11        |
| 12        | AF145801_1 immunoreactive 46 kDa antigen PG99 [Porphyromonas gingivalis]                                                                    |     |        |   | 30.26  | 12.30    | 45671.6  | 5081703   | 4 (4 0 0 0 0)   |       |          | 0.20        |
| 13        | PRTT_PORGI RecName: Full=Thiol protease/hemagglutinin prtI; Flags: Precursor                                                                |     |        |   | 30.22  | 4.30     | 96386.1  | 1172653   | 3 (3 0 0 0 0)   |       |          | 0.10        |
| 14        | AF155223_1 tonB-linked receptor Tlr [Porphyromonas gingivalis]                                                                              |     |        |   | 30.21  | 6.20     | 78856.5  | 5007082   | 3 (3 0 0 0 0)   |       |          | 0.12        |
| 15        | CPG1_PORGI RecName: Full=Gingipain R1; AltName: Full=Arg-gingipain; AltName: Full=Gingipain 1; AltName: Full=RGP-1; Flags: Precursor        |     |        |   | 20.31  | 4.60     | 108713.4 | 2827775   | 3 (3 0 0 0 0)   |       |          | 1.17        |
| 16        | arginine-specific thiol protease precursor [Porphyromonas gingivalis]                                                                       |     |        |   | 20.25  | 1.20     | 185509.3 | 1066835   | 2 (2 0 0 0 0)   |       |          | 0.48        |
| 17        | AF144641_1 immunoreactive 53 kD antigen PG123 [Porphyromonas gingivalis]                                                                    |     |        |   | 20.18  | 5.60     | 53491.0  | 4929297   | 2 (2 0 0 0 0)   |       |          | 0.06        |
| 18        | B Chain B, Structure Of Porphyromonas Gingivalis Heme-Binding Protein HmuY In Complex With Heme                                             |     |        |   | 20.17  | 11.00    | 21190.3  | 237640668 | 2 (2 0 0 0 0)   |       |          | 0.12        |
| 19        | RagB4 [Porphyromonas gingivalis]                                                                                                            |     |        |   | 20.16  | 2.00     | 56866.6  | 61652417  | 2 (2 0 0 0 0)   |       |          | 0.29        |

  

| BAND #3   |                                                                                                                                             |     |        |   |        |          |          |           |                 |       |          |             |
|-----------|---------------------------------------------------------------------------------------------------------------------------------------------|-----|--------|---|--------|----------|----------|-----------|-----------------|-------|----------|-------------|
| Reference | Peptide                                                                                                                                     | MH+ | DeltaM | z | Score  | Coverage | MW       | Accession | Peptide (Hits)  | Count | % Height | Peak Height |
| Scan(s)   |                                                                                                                                             |     |        |   | XC     | DeltaCn  | Sp       | RSp       | Ions            |       |          |             |
| 1         | AF200358_1 HmuY protein [Porphyromonas gingivalis]                                                                                          |     |        |   | 210.37 | 83.10    | 15552.7  | 6409428   | 32 (32 0 0 0 0) |       |          | 36.51       |
| 2         | KGP83_PORGI RecName: Full=Lys-gingipain W83; AltName: Full=Lysine specific cysteine protease; AltName: Full=Lysine-specific cysteine protei |     |        |   | 210.36 | 16.90    | 187756.8 | 75348574  | 25 (25 0 0 0 0) |       |          | 5.82        |
| 3         | AF145801_1 immunoreactive 46 kDa antigen PG99 [Porphyromonas gingivalis]                                                                    |     |        |   | 120.34 | 26.70    | 45671.6  | 5081703   | 17 (17 0 0 0 0) |       |          | 2.86        |
| 4         | A Chain A, Crystal Structure Of The Arg Specific Cysteine Proteinase Gingipain R (Rgpb)                                                     |     |        |   | 110.31 | 25.50    | 47853.8  | 7245522   | 14 (14 0 0 0 0) |       |          | 5.10        |
| 5         | B Chain B, Structure Of Porphyromonas Gingivalis Heme-Binding Protein HmuY In Complex With Heme                                             |     |        |   | 90.28  | 20.90    | 21190.3  | 237640668 | 13 (13 0 0 0 0) |       |          | 37.79       |
| 6         | unnamed protein product [Porphyromonas gingivalis]                                                                                          |     |        |   | 90.27  | 24.60    | 56434.6  | 116636501 | 9 (9 0 0 0 0)   |       |          | 0.86        |
| 7         | JC7920 35K hemin binding protein - Porphyromonas gingivalis                                                                                 |     |        |   | 60.29  | 21.20    | 37536.4  | 60729604  | 7 (7 0 0 0 0)   |       |          | 0.60        |
| 8         | AF155223_1 tonB-linked receptor Tlr [Porphyromonas gingivalis]                                                                              |     |        |   | 50.19  | 7.50     | 78856.5  | 5007082   | 5 (5 0 0 0 0)   |       |          | 0.46        |
| 9         | KGP66_PORGI RecName: Full=Lys-gingipain HG66; Contains: RecName: Full=Lys-gingipain catalytic subunit; Contains: RecName: Full=39 kDa       |     |        |   | 40.34  | 3.00     | 186713.3 | 75345025  | 5 (5 0 0 0 0)   |       |          | 1.16        |
| 10        | CPG2_PORGI RecName: Full=Gingipain R2; AltName: Full=Arg-gingipain; AltName: Full=Gingipain 2; AltName: Full=RGP-2; Flags: Precursor        |     |        |   | 40.30  | 7.20     | 80916.2  | 37538303  | 5 (5 0 0 0 0)   |       |          | 2.08        |
| 11        | receptor antigen (RagA) [Porphyromonas gingivalis]                                                                                          |     |        |   | 40.24  | 4.20     | 112261.3 | 3901098   | 4 (4 0 0 0 0)   |       |          | 0.95        |
| 12        | CPG1_PORGI RecName: Full=Gingipain R1; AltName: Full=Arg-gingipain; AltName: Full=Gingipain 1; AltName: Full=RGP-1; Flags: Precursor        |     |        |   | 30.28  | 4.60     | 108713.4 | 2827775   | 4 (4 0 0 0 0)   |       |          | 0.92        |
| 13        | HAGA1_PORGI RecName: Full=Hemagglutinin A; Flags: Precursor                                                                                 |     |        |   | 30.23  | 7.00     | 233241.6 | 38605638  | 3 (3 0 0 0 0)   |       |          | 0.29        |
| 14        | arginine-specific thiol protease precursor [Porphyromonas gingivalis]                                                                       |     |        |   | 20.26  | 1.20     | 185509.3 | 1066835   | 2 (2 0 0 0 0)   |       |          | 0.28        |
| 15        | hemin-binding protein 2 [Porphyromonas gingivalis]                                                                                          |     |        |   | 20.26  | 7.40     | 233241.6 | 38605638  | 5 (5 0 0 0 0)   |       |          | 4.08        |
| 16        | OMP40_PORGI RecName: Full=Outer membrane protein 40; Short=Omp40; AltName: Full=PG33; Flags: Precursor                                      |     |        |   | 20.23  | 8.20     | 42425.2  | 27805653  | 2 (2 0 0 0 0)   |       |          | 0.08        |
| 17        | AF145799_1 immunogenic 23 kDa lipoprotein PG3 [Porphyromonas gingivalis]                                                                    |     |        |   | 20.20  | 11.70    | 22616.6  | 5081699   | 2 (2 0 0 0 0)   |       |          | 0.00        |
| 18        | AF153770_1 immunoreactive 47 kDa antigen PG97 [Porphyromonas gingivalis]                                                                    |     |        |   | 20.17  | 4.70     | 47120.1  | 5059350   | 2 (2 0 0 0 0)   |       |          | 0.14        |

  

| BAND #4   |                                                                                                                                             |     |        |   |        |          |          |           |                 |       |          |             |
|-----------|---------------------------------------------------------------------------------------------------------------------------------------------|-----|--------|---|--------|----------|----------|-----------|-----------------|-------|----------|-------------|
| Reference | Peptide                                                                                                                                     | MH+ | DeltaM | z | Score  | Coverage | MW       | Accession | Peptide (Hits)  | Count | % Height | Peak Height |
| Scan(s)   |                                                                                                                                             |     |        |   | XC     | DeltaCn  | Sp       | RSp       | Ions            |       |          |             |
| 1         | KGP83_PORGI RecName: Full=Lys-gingipain W83; AltName: Full=Lysine specific cysteine protease; AltName: Full=Lysine-specific cysteine protei |     |        |   | 250.35 | 19.80    | 187756.8 | 75348574  | 31 (31 0 0 0 0) |       |          | 18.23       |
| 2         | A Chain A, Crystal Structure Of The Arg Specific Cysteine Proteinase Gingipain R (Rgpb)                                                     |     |        |   | 130.32 | 28.30    | 47853.8  | 7245522   | 15 (15 0 0 0 0) |       |          | 19.37       |
| 3         | OMP41_PORGI RecName: Full=Outer membrane protein 41; Short=Omp41; AltName: Full=PG32; Flags: Precursor                                      |     |        |   | 80.26  | 20.50    | 43397.1  | 37538316  | 9 (9 0 0 0 0)   |       |          | 3.42        |
| 4         | AF200358_1 HmuY protein [Porphyromonas gingivalis]                                                                                          |     |        |   | 70.32  | 69.70    | 15552.7  | 6409428   | 9 (9 0 0 0 0)   |       |          | 3.75        |
| 5         | unnamed protein product [Porphyromonas gingivalis]                                                                                          |     |        |   | 70.25  | 16.20    | 56434.6  | 116636501 | 7 (7 0 0 0 0)   |       |          | 2.72        |
| 6         | receptor antigen (RagA) [Porphyromonas gingivalis]                                                                                          |     |        |   | 70.24  | 9.60     | 112261.3 | 3901098   | 7 (7 0 0 0 0)   |       |          | 3.63        |
| 7         | casein alpha s1 [Bos taurus]                                                                                                                |     |        |   | 60.24  | 31.30    | 24513.4  | 30794348  | 8 (8 0 0 0 0)   |       |          | 8.69        |
| 8         | CPG2_PORGI RecName: Full=Gingipain R2; AltName: Full=Arg-gingipain; AltName: Full=Gingipain 2; AltName: Full=RGP-2; Flags: Precursor        |     |        |   | 50.29  | 8.20     | 80916.2  | 37538303  | 6 (6 0 0 0 0)   |       |          | 3.45        |
| 9         | HAGA1_PORGI RecName: Full=Hemagglutinin A; Flags: Precursor                                                                                 |     |        |   | 50.23  | 7.80     | 233241.6 | 38605638  | 5 (5 0 0 0 0)   |       |          | 1.68        |
| 10        | OMP40_PORGI RecName: Full=Outer membrane protein 40; Short=Omp40; AltName: Full=PG33; Flags: Precursor                                      |     |        |   | 50.23  | 15.80    | 42425.2  | 27805653  | 5 (5 0 0 0 0)   |       |          | 1.31        |
| 11        | CPG1_PORGI RecName: Full=Gingipain R1; AltName: Full=Arg-gingipain; AltName: Full=Gingipain 1; AltName: Full=RGP-1; Flags: Precursor        |     |        |   | 30.27  | 4.60     | 108713.4 | 2827775   | 4 (4 0 0 0 0)   |       |          | 7.98        |
| 12        | AF155223_1 tonB-linked receptor Tlr [Porphyromonas gingivalis]                                                                              |     |        |   | 30.27  | 6.20     | 78856.5  | 5007082   | 3 (3 0 0 0 0)   |       |          | 0.62        |
| 13        | JC7920 35K hemin binding protein - Porphyromonas gingivalis                                                                                 |     |        |   | 30.21  | 7.60     | 37536.4  | 60729604  | 3 (3 0 0 0 0)   |       |          | 0.48        |
| 14        | keratin 71 [Homo sapiens]                                                                                                                   |     |        |   | 30.18  | 6.10     | 57256.1  | 15618995  | 3 (3 0 0 0 0)   |       |          | 0.67        |
| 15        | B Chain B, Structure Of Porphyromonas Gingivalis Heme-Binding Protein HmuY In Complex With Heme                                             |     |        |   | 30.16  | 11.00    | 21190.3  | 237640668 | 3 (3 0 0 0 0)   |       |          | 1.33        |
| 16        | KGP66_PORGI RecName: Full=Lys-gingipain HG66; Contains: RecName: Full=Lys-gingipain catalytic subunit; Contains: RecName: Full=39 kDa       |     |        |   | 20.34  | 1.60     | 186713.3 | 75345025  | 3 (3 0 0 0 0)   |       |          | 22.50       |
| 17        | RagB4 [Porphyromonas gingivalis]                                                                                                            |     |        |   | 20.11  | 2.00     | 56866.6  | 61652417  | 2 (2 0 0 0 0)   |       |          | 0.19        |

  

| BAND #5   |                                                                                                                                             |     |        |   |        |          |          |           |                 |       |          |             |
|-----------|---------------------------------------------------------------------------------------------------------------------------------------------|-----|--------|---|--------|----------|----------|-----------|-----------------|-------|----------|-------------|
| Reference | Peptide                                                                                                                                     | MH+ | DeltaM | z | Score  | Coverage | MW       | Accession | Peptide (Hits)  | Count | % Height | Peak Height |
| Scan(s)   |                                                                                                                                             |     |        |   | XC     | DeltaCn  | Sp       | RSp       | Ions            |       |          |             |
| 1         | KGP83_PORGI RecName: Full=Lys-gingipain W83; AltName: Full=Lysine specific cysteine protease; AltName: Full=Lysine-specific cysteine protei |     |        |   | 270.36 | 19.60    | 187756.8 | 75348574  | 38 (38 0 0 0 0) |       |          | 69.48       |
| 2         | A Chain A, Crystal Structure Of The Arg Specific Cysteine Proteinase Gingipain R (Rgpb)                                                     |     |        |   | 110.31 | 21.80    | 47853.8  | 7245522   | 13 (13 0 0 0 0) |       |          | 7.40        |
| 3         | receptor antigen (RagA) [Porphyromonas gingivalis]                                                                                          |     |        |   | 110.26 | 14.20    | 112261.3 | 3901098   | 12 (12 0 0 0 0) |       |          | 2.64        |
| 4         | DPS_PORGI RecName: Full=DNA protection during starvation protein                                                                            |     |        |   | 90.31  | 57.20    | 17853.3  | 229485357 | 9 (9 0 0 0 0)   |       |          | 2.64        |
| 5         | AF200358_1 HmuY protein [Porphyromonas gingivalis]                                                                                          |     |        |   | 50.31  | 45.10    | 15552.7  | 6409428   | 5 (5 0 0 0 0)   |       |          | 0.89        |
| 6         | JC7920 35K hemin binding protein - Porphyromonas gingivalis                                                                                 |     |        |   | 50.26  | 17.70    | 37536.4  | 60729604  | 5 (5 0 0 0 0)   |       |          | 0.87        |
| 7         | unnamed protein product [Porphyromonas gingivalis]                                                                                          |     |        |   | 50.21  | 40.60    | 18516.1  | 116636495 | 5 (5 0 0 0 0)   |       |          | 1.45        |
| 8         | AF155223_1 tonB-linked receptor Tlr [Porphyromonas gingivalis]                                                                              |     |        |   | 40.22  | 7.80     | 78856.5  | 5007082   | 5 (5 0 0 0 0)   |       |          | 1.06        |
| 9         | THIO_ECOLI RecName: Full=Thioredoxin-1; Short=Trx-1                                                                                         |     |        |   | 30.20  | 39.40    | 11799.1  | 76363560  | 3 (3 0 0 0 0)   |       |          | 0.60        |

|    |                                                                                                                                         |       |      |          |           |             |      |
|----|-----------------------------------------------------------------------------------------------------------------------------------------|-------|------|----------|-----------|-------------|------|
| 10 | CPG1_PORGI RecName: Full=Gingipain R1; AltName: Full=Arg-gingipain; AltName: Full=Gingipain 1; AltName: Full=RGP-1; Flags: Precursor    | 30.20 | 5.20 | 108713.4 | 2827775   | 3 (3 0 0 0) | 0.38 |
| 11 | HAGA1_PORGI RecName: Full=Hemagglutinin A; Flags: Precursor                                                                             | 30.16 | 5.00 | 233241.6 | 38605638  | 3 (3 0 0 0) | 1.02 |
| 12 | KGP66_PORGI RecName: Full=Lys-gingipain HG66; Contains: RecName: Full=Lys-gingipain catalytic subunit; Contains: RecName: Full=39 kDa ; | 20.34 | 1.60 | 186713.3 | 75345025  | 3 (3 0 0 0) | 1.22 |
| 13 | PRTH_PORGI RecName: Full=Protease prth                                                                                                  | 20.29 | 1.60 | 110168.0 | 1172651   | 3 (3 0 0 0) | 6.85 |
| 14 | CPG2_PORGI RecName: Full=Gingipain R2; AltName: Full=Arg-gingipain; AltName: Full=Gingipain 2; AltName: Full=RGP-2; Flags: Precursor    | 20.25 | 2.20 | 80916.2  | 37538303  | 3 (3 0 0 0) | 2.73 |
| 15 | OMP40_PORGI RecName: Full=Outer membrane protein 40; Short=Omp40; AltName: Full=PG33; Flags: Precursor                                  | 20.21 | 8.20 | 42425.2  | 27805653  | 2 (2 0 0 0) | 0.30 |
| 16 | RagA2 [Porphyromonas gingivalis]                                                                                                        | 20.19 | 2.30 | 115464.3 | 61652426  | 2 (2 0 0 0) | 0.19 |
| 17 | hemin-binding protein 2 [Porphyromonas gingivalis]                                                                                      | 20.19 | 7.40 | 23833.9  | 124053198 | 2 (2 0 0 0) | 0.07 |
| 18 | unnamed protein product [Porphyromonas gingivalis]                                                                                      | 20.15 | 6.40 | 56434.6  | 116636501 | 2 (2 0 0 0) | 0.20 |

**BAND #6**

| Reference | Score                                                                                                                                       | Coverage | MW     | Accession | Peptide (Hits) | % Height      |       |     |      |       |             |
|-----------|---------------------------------------------------------------------------------------------------------------------------------------------|----------|--------|-----------|----------------|---------------|-------|-----|------|-------|-------------|
| Scan(s)   | Peptide                                                                                                                                     | MH+      | DeltaM | z         | XC             | DeltaCn       | Sp    | RSp | Ions | Count | Peak Height |
| 1         | KGP83_PORGI RecName: Full=Lys-gingipain W83; AltName: Full=Lysine specific cysteine protease; AltName: Full=Lysine-specific cysteine protei | 230.37   | 18.20  | 187756.8  | 75348574       | 26 (26 0 0 0) | 55.62 |     |      |       |             |
| 2         | unnamed protein product [Porphyromonas gingivalis]                                                                                          | 130.38   | 34.30  | 56434.6   | 116636501      | 14 (14 0 0 0) | 3.26  |     |      |       |             |
| 3         | AF155223_1 tonB-linked receptor Tir [Porphyromonas gingivalis]                                                                              | 100.28   | 16.10  | 78856.5   | 5007082        | 10 (10 0 0 0) | 0.83  |     |      |       |             |
| 4         | JC7920 35K hemin binding protein - Porphyromonas gingivalis                                                                                 | 100.25   | 25.60  | 37536.4   | 60729604       | 10 (10 0 0 0) | 3.46  |     |      |       |             |
| 5         | A Chain A, Crystal Structure Of The Arg Specific Cysteine Proteinase Gingipain R (Rgpb)                                                     | 90.32    | 23.70  | 47853.8   | 7245522        | 11 (11 0 0 0) | 7.57  |     |      |       |             |
| 6         | CPG2_PORGI RecName: Full=Gingipain R2; AltName: Full=Arg-gingipain; AltName: Full=Gingipain 2; AltName: Full=RGP-2; Flags: Precursor        | 50.31    | 8.20   | 80916.2   | 37538303       | 7 (7 0 0 0)   | 7.16  |     |      |       |             |
| 7         | AF144641_1 immunoreactive 53 kD antigen PG123 [Porphyromonas gingivalis]                                                                    | 50.22    | 13.40  | 53491.0   | 4929297        | 5 (5 0 0 0)   | 2.20  |     |      |       |             |
| 8         | unnamed protein product [Porphyromonas gingivalis]                                                                                          | 50.20    | 9.60   | 73112.1   | 300548609      | 5 (5 0 0 0)   | 1.52  |     |      |       |             |
| 9         | AF200358_1 HmuY protein [Porphyromonas gingivalis]                                                                                          | 40.27    | 36.60  | 15552.7   | 6409428        | 4 (4 0 0 0)   | 1.04  |     |      |       |             |
| 10        | receptor antigen (RagA) [Porphyromonas gingivalis]                                                                                          | 40.20    | 4.80   | 112261.3  | 3901098        | 4 (4 0 0 0)   | 0.18  |     |      |       |             |
| 11        | PAD_PORGI RecName: Full=Peptidylarginine deiminase; Flags: Precursor                                                                        | 40.18    | 6.80   | 61690.5   | 73621345       | 5 (5 0 0 0)   | 0.76  |     |      |       |             |
| 12        | AF153770_1 immunoreactive 47 kDa antigen PG97 [Porphyromonas gingivalis]                                                                    | 40.18    | 10.70  | 47120.1   | 5059350        | 4 (4 0 0 0)   | 0.93  |     |      |       |             |
| 13        | PRTH_PORGI RecName: Full=Protease prth                                                                                                      | 30.33    | 1.90   | 110168.0  | 1172651        | 5 (5 0 0 0)   | 9.51  |     |      |       |             |
| 14        | THIO_ECOLI RecName: Full=Thioredoxin-1; Short=Trx-1                                                                                         | 30.25    | 39.40  | 11799.1   | 76363560       | 3 (3 0 0 0)   | 0.66  |     |      |       |             |
| 15        | arginine-specific thiol protease precursor [Porphyromonas gingivalis]                                                                       | 30.24    | 1.50   | 185509.3  | 1066835        | 3 (3 0 0 0)   | 0.97  |     |      |       |             |
| 16        | CPG1_PORGI RecName: Full=Gingipain R1; AltName: Full=Arg-gingipain; AltName: Full=Gingipain 1; AltName: Full=RGP-1; Flags: Precursor        | 30.22    | 5.80   | 108713.4  | 2827775        | 4 (4 0 0 0)   | 1.17  |     |      |       |             |
| 17        | KGP38_PORGI RecName: Full=Lys-gingipain 381; Contains: RecName: Full=Lys-gingipain catalytic subunit; Contains: RecName: Full=39 kDa adl    | 20.25    | 2.80   | 187143.7  | 75345024       | 2 (2 0 0 0)   | 1.50  |     |      |       |             |
| 18        | SERC_PORGI RecName: Full=Phosphoserine aminotransferase; AltName: Full=Phosphohydroxythreonine aminotransferase; Short=PSAT                 | 20.25    | 7.50   | 40148.6   | 73621876       | 2 (2 0 0 0)   | 0.35  |     |      |       |             |
| 19        | AF145801_1 immunoreactive 46 kDa antigen PG99 [Porphyromonas gingivalis]                                                                    | 20.24    | 7.20   | 45671.6   | 5081703        | 3 (3 0 0 0)   | 0.32  |     |      |       |             |
| 20        | AF237554_1 hypothetical tonB-linked outer membrane receptor PG50 [Porphyromonas gingivalis]                                                 | 20.21    | 2.60   | 94396.0   | 8925305        | 2 (2 0 0 0)   | 0.12  |     |      |       |             |
| 21        | unnamed protein product [Porphyromonas gingivalis]                                                                                          | 20.16    | 16.90  | 18516.1   | 116636495      | 2 (2 0 0 0)   | 0.11  |     |      |       |             |
| 22        | AF155351_1 immunoreactive 32 kD antigen PG25 [Porphyromonas gingivalis]                                                                     | 20.15    | 4.10   | 32252.1   | 5052029        | 2 (2 0 0 0)   | 0.76  |     |      |       |             |
